# Supplementary material
Source: publisher figshare collection journal article supplement (https://acs.figshare.com/ndownloader/files/4285525)
Supplement: Supplementary file 1 [file 4285525]

## Supporting Information

### Magnetic Systems with Mixed Carboxylate and Azide Bridges: Slow Relaxation in Co(II) Metamagnet and Spin Frustration in Mn(II) Compound

*Yan-Qin Wang, Xiu-Mei Zhang, Xiu-Bing Li, Bing-Wu Wang and En-Qing Gao\**

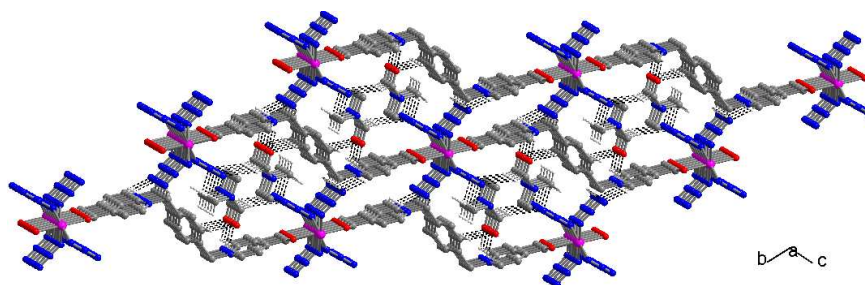

**Figure S1.** 3D packing of the layers through hydrogen bonding interactions in **1**. The relevant parameters are  $N4\cdots H5A = 2.366(3) \text{ \AA}$ ,  $C5-H5A\cdots N4 = 157.46(15)^\circ$ ;  $N4\cdots H7A = 2.517(3) \text{ \AA}$ ,  $C7-H7A\cdots N4 = 42.27(13)^\circ$ ;  $N4\cdots H7B = 2.497(3) \text{ \AA}$ ,  $C7-H7B\cdots N4 = 146.45(14)^\circ$ ;  $N7\cdots H11C = 2.543(5) \text{ \AA}$ ,  $C11-H11C\cdots N7 = 147.71(32)^\circ$ ;  $N7\cdots H13C = 2.564(5) \text{ \AA}$ ,  $C13-H13C\cdots N7 = 139.29(3)^\circ$ ;  $O3\cdots H9A = 2.285(4) \text{ \AA}$ ,  $C9-H9A\cdots O3 = 161.62(3)^\circ$ ;  $O3\cdots H4A = 2.374(4) \text{ \AA}$ ,  $C4-H4A\cdots O3 = 126.31(1)^\circ$ .

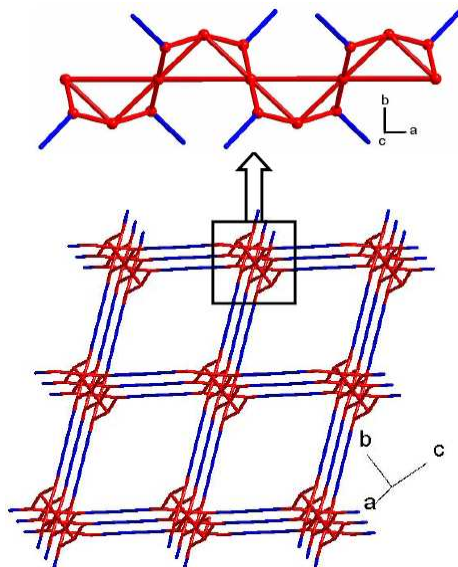

**Figure S2.** Views of the chain topology (top) and the 3D net topology (bottom) for **2**.

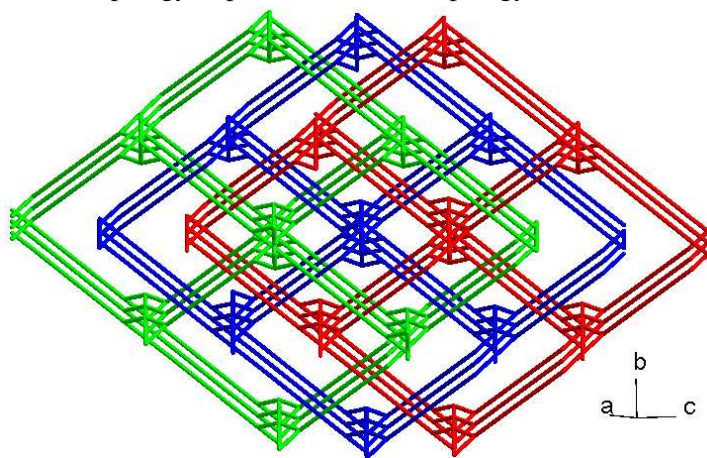

**Figure S3.** The 3-fold interpenetration of the 3D nets in **2**.

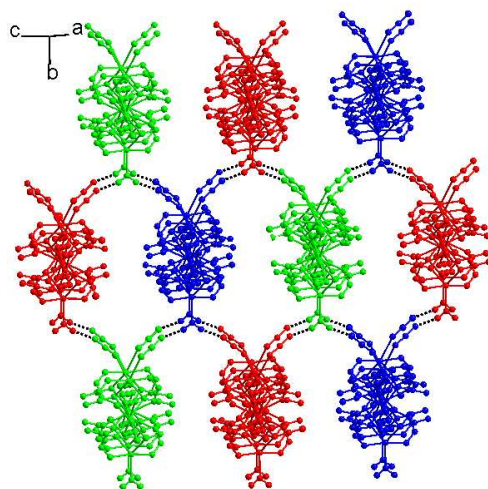

**Figure S4.** The O-H...N hydrogen bonds between the  $\Delta$ -chains in **2**. The color is used to distinguish the chains from different 3D frameworks .

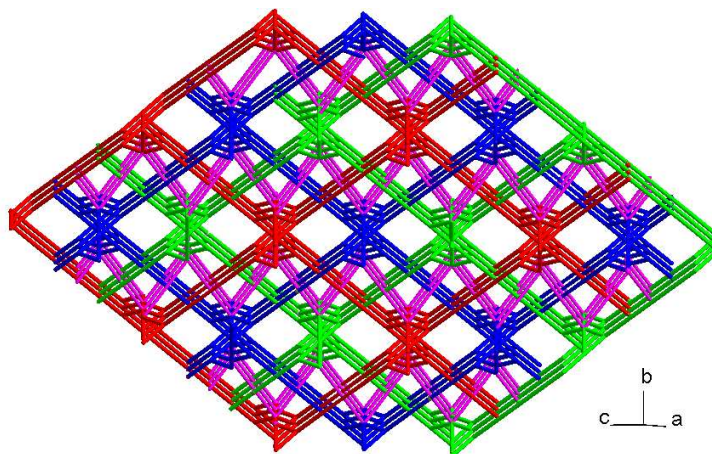

**Figure S5.** The 3,6,6-connected 3D network of **2** with hydrogen bonding involved. The red, blue and green parts correspond to the three interpenetrated coordination frameworks as shown in Figure S3, and the purple connections represent the O-H...N hydrogen bonds between the frameworks

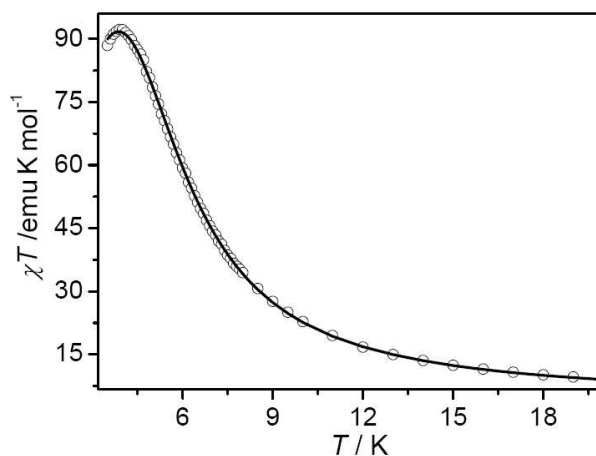

**Figure S6.** Fit of the ac  $\chi T$  data to infinite Ising chains with interchain interactions [eqns. (2) and (3) in the text]. The data used are measured under zero dc field, with a driving ac field of 3.5 Oe at a frequency of 1 Hz. The solid line represents the best fit.

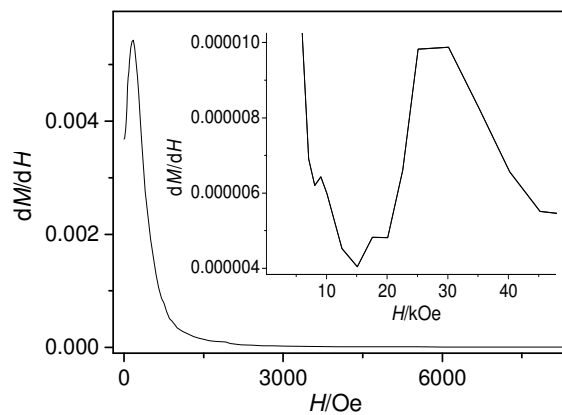

**Figure S7.** The  $dM/dH$  versus  $T$  plots at low fields and high fields (inset).

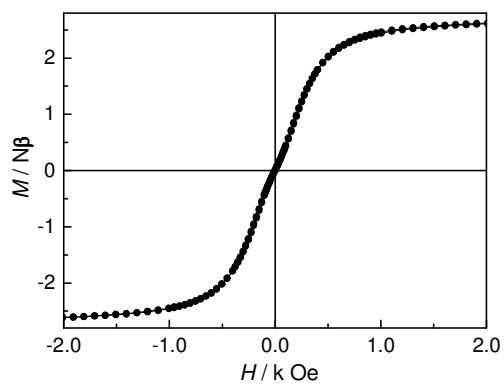

**Figure S8.** Isothermal magnetization of **1** at 2 K.

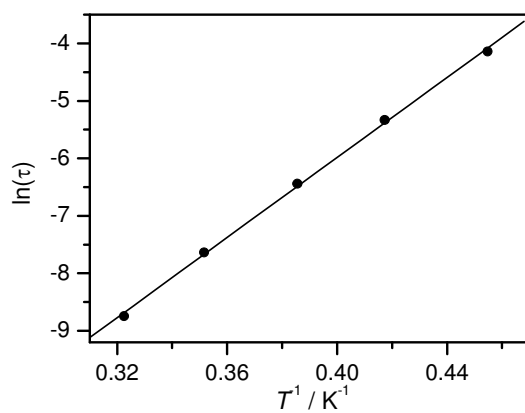

**Figure S9.** The  $\ln(\tau)$  versus  $1/T$  plot, the solid line representing the fit to the Arrhenius law.

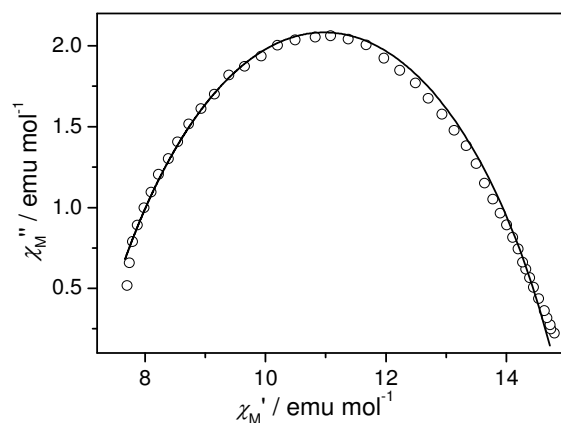

**Figure S10.** Cole-Cole diagrams in the frequency range 0.1-1000 Hz with  $H_{dc} = 0$ ,  $H_{ac} = 3$  Oe for **1**.

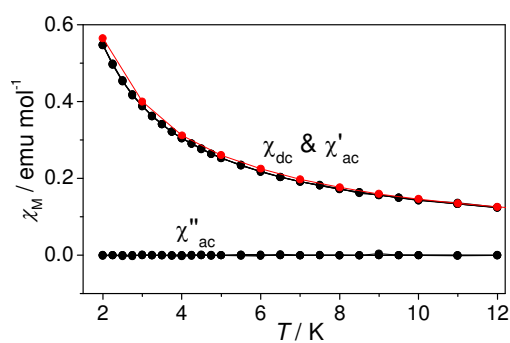

**Figure S11.**  $\chi_{dc}$  vs  $T$  plot (red) with  $H_{dc} = 1000$  Oe, and  $\chi_{ac}'$  and  $\chi''$  vs  $T$  plots (black) in zero dc field for **2** with  $H_{ac} = 3.0$  Oe at frequencies 1, 10, 100, 1000 Hz.
